# Supplementary material for: High efficiency capture of biomarker miRNA15a for noninvasive diagnosis of malignant kidney tumors
Source: Royal Society of Chemistry journal article supplement (doi:10.1039/d1bm01737c), 2022-01-01
Supplement: d1bm01737c1.pdf [file d1bm01737c1.pdf]

## Supporting Information

### High Efficiency Capture of Biomarker miRNA15a for Noninvasive Diagnosis of Malignant Kidney Tumors

Alexander M. Renner, Christina Derichsweiler, Shaista Ilyas, Isabel Gessner, Jochen W. U. Fries and Sanjay Mathur\*

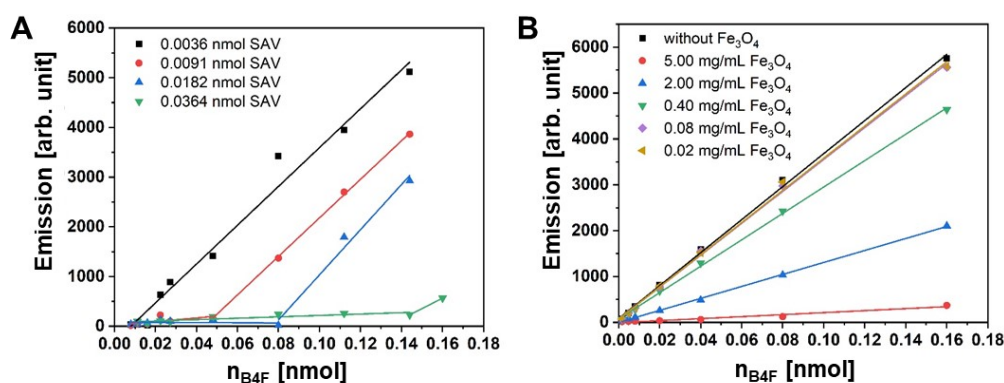

**Figure S1:** (A) Quenching effect of SAV on B4F shows, that up to 4 B4F molecules can bind on one SAV protein. (B) Based on particle scattering effect, Fe<sub>3</sub>O<sub>4</sub>@DHCA dispersions higher than 0.08 mg/mL have a quenching effect on the fluorescence of B4F.

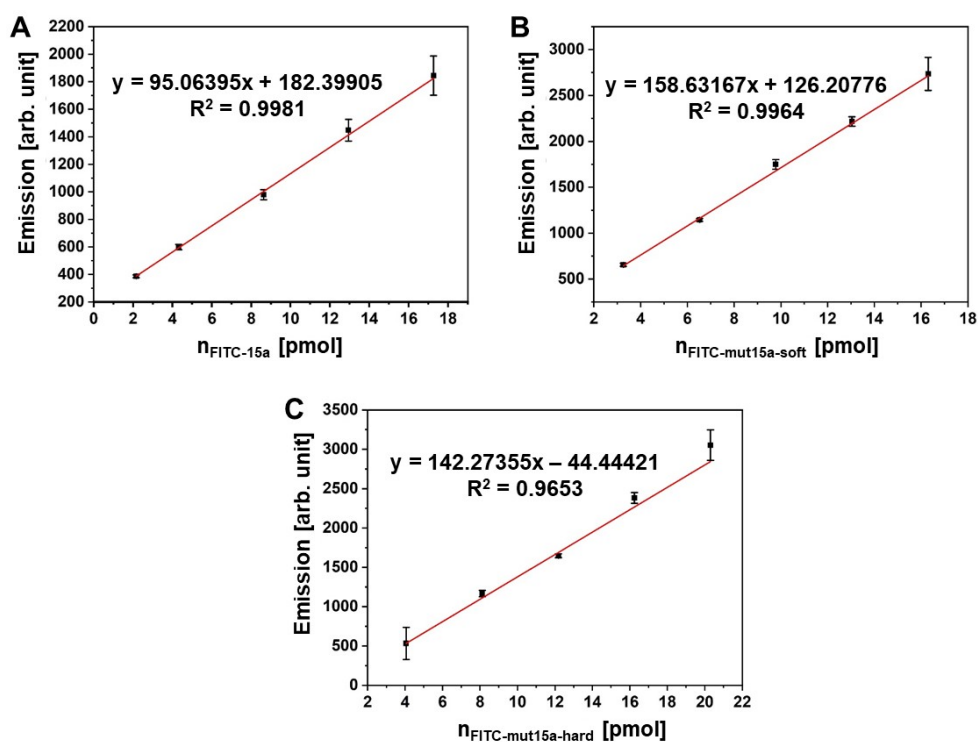

**Figure S2:** Calibration line of (A) FITC-15a, (B) FITC-mut15a-soft and (C) FITC-mut15a-hard.

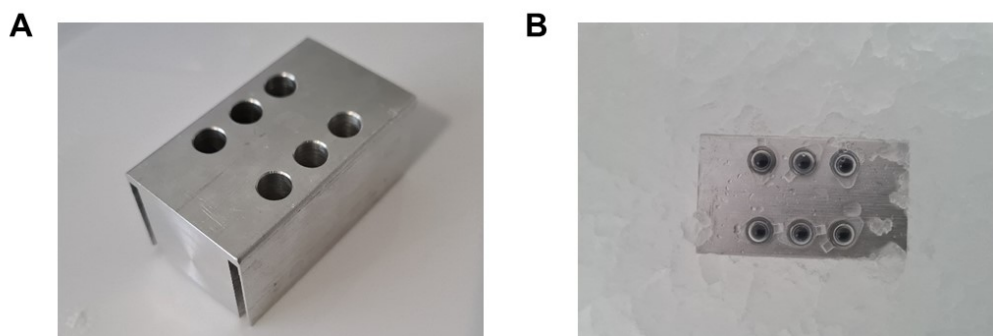

**Figure S3:** (A-B) Designed cooling block, made of aluminium for the hybridization of ssDNA-15a and FITC-C-tail with 6 places for PCR-tubes and 2 small slots for magnets.

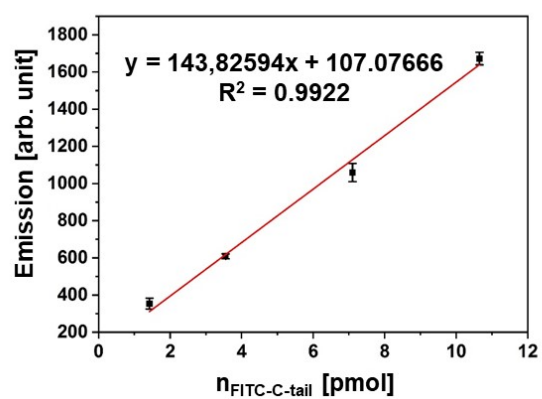

**Figure S4:** Calibration line of FITC-C-tail after cooling *via* ice bath.
